# Supplementary material
Source: PubMed Central journal article supplement (PMC6299325)
Supplement: NIHMS1506084-supplement-3.pdf [file NIHMS1506084-supplement-3.pdf]

**A Scalable, Integrated Intervention to Engage People Who Inject Drugs in HIV Care and Medication-Assisted Treatment: A Randomized, Controlled Vanguard Trial (HPTN 074)**

**Miller WC, Hoffman IF, Hanscom BS, et al.**

**SUPPLEMENTAL MATERIALS**

**APPENDIX C: Additional Results and Figures**

## APPENDIX, PART 3, SUPPLEMENTAL RESULTS

| <b>Supplemental Table 1: Status transitions between 26 and 52 weeks, ART, viral suppression, and MAT</b> |                     |               |             |
|----------------------------------------------------------------------------------------------------------|---------------------|---------------|-------------|
|                                                                                                          | Status at 52 weeks* |               |             |
|                                                                                                          | Yes**               | No            | Deceased    |
|                                                                                                          | n (%)               | n (%)         | n (%)       |
| <i>ART status at 26 weeks</i>                                                                            |                     |               |             |
| Intervention                                                                                             |                     |               |             |
| On ART                                                                                                   | 73/79 (92%)         | 6/79 (8%)     | 0/79 (0%)   |
| Not on ART                                                                                               | 4/20 (20%)          | 16/20 (80%)   | 0/20 (0%)   |
| SOC                                                                                                      |                     |               |             |
| On ART                                                                                                   | 94/112 (84%)        | 8/112 (7%)    | 10/112 (9%) |
| Not on ART                                                                                               | 40/175 (23%)        | 125/175 (71%) | 10/175 (6%) |
| <i>MAT status at 26 weeks</i>                                                                            |                     |               |             |
| Intervention                                                                                             |                     |               |             |
| On MAT                                                                                                   | 39/41 (95%)         | 2/41 (5%)     | 0/41 (0%)   |
| Not on MAT                                                                                               | 5/57 (9%)           | 52/57 (91%)   | 0/57 (0%)   |
| SOC                                                                                                      |                     |               |             |
| On MAT                                                                                                   | 61/77 (79%)         | 11/77 (14%)   | 5/77 (6%)   |
| Not on MAT                                                                                               | 14/210 (7%)         | 181/210 (86%) | 15/210 (7%) |

\*Persons with missing visits are excluded for each time point (complete case analysis)

\*\*Yes=On ART, Virally suppressed, or On MAT

Notes: Percentages reflect row percentages.

Abbreviations: ART=antiretroviral therapy; MAT=medication-assisted treatment; SOC=standard of care arm

| <b>Supplemental Table 2: Viral load categories, 26 and 52 weeks</b> |       |                     |             |           |
|---------------------------------------------------------------------|-------|---------------------|-------------|-----------|
|                                                                     | Total | HIV RNA (copies/mL) |             |           |
|                                                                     |       | <40                 | 40 to <1000 | ≥ 1000    |
|                                                                     |       | n (%)               | n (%)       | n (%)     |
| <i>26 weeks</i>                                                     |       |                     |             |           |
| On ART                                                              | 203   | 93 (46%)            | 36 (18%)    | 74 (36%)  |
| Not on ART                                                          | 216   | 2 (1%)              | 9 (4%)      | 205 (95%) |
| <i>52 weeks</i>                                                     |       |                     |             |           |
| On ART                                                              | 220   | 120 (55%)           | 29 (13%)    | 71 (32%)  |
| Not on ART                                                          | 169   | 5 (3%)              | 10 (6%)     | 153 (91%) |

Notes: Percentages reflect row percentages.

29 participants were deceased by week 26; 51 participants were deceased by week 52.

54 participants had missing data at week 26; 62 participants had missing data at week 52.

Abbreviations: ART=antiretroviral therapy

**Supplemental Table 3: Viral load distributions for participants who were not virally suppressed, 26 and 52 weeks**

|                 | HIV RNA (copies/mL) |        |                       |                       |                       |                       |
|-----------------|---------------------|--------|-----------------------|-----------------------|-----------------------|-----------------------|
|                 | n                   | Median | 10 <sup>th</sup> %ile | 25 <sup>th</sup> %ile | 75 <sup>th</sup> %ile | 90 <sup>th</sup> %ile |
| <i>26 weeks</i> |                     |        |                       |                       |                       |                       |
| Intervention    |                     |        |                       |                       |                       |                       |
| On ART          | 42                  | 10846  | 61                    | 204                   | 82248                 | 259184                |
| Not on ART      | 24                  | 24421  | 2735                  | 6957                  | 129590                | 232661                |
| SOC             |                     |        |                       |                       |                       |                       |
| On ART          | 68                  | 10956  | 69                    | 274                   | 54522                 | 324570                |
| Not on ART      | 190                 | 26586  | 2231                  | 6692                  | 99135                 | 272691                |
| <i>52 weeks</i> |                     |        |                       |                       |                       |                       |
| Intervention    |                     |        |                       |                       |                       |                       |
| On ART          | 35                  | 14765  | 64                    | 526                   | 49863                 | 169553                |
| Not on ART      | 24                  | 23067  | 3159                  | 12318                 | 131650                | 218544                |
| SOC             |                     |        |                       |                       |                       |                       |
| On ART          | 65                  | 16356  | 59                    | 557                   | 80168                 | 251107                |
| Not on ART      | 139                 | 31673  | 1580                  | 6041                  | 85452                 | 242103                |

Notes: complete case analyses are shown with missing data excluded.

Abbreviations: %ile=percentile; ART=antiretroviral therapy; SOC=standard of care arm

**Supplemental Table 4: Status at 26 and 52 weeks and time to event for viral suppression (<1000 copies/mL)**

|                                     | Status <sup>1</sup> at 26 weeks |            |                | Status <sup>1</sup> at 52 weeks |            |                | Time to Event <sup>2</sup> |
|-------------------------------------|---------------------------------|------------|----------------|---------------------------------|------------|----------------|----------------------------|
|                                     | Intervention                    | SOC        | PR (95% CI)    | Intervention                    | SOC        | PR (95% CI)    | HR (95% CI)                |
|                                     | Percentage                      | Percentage |                | Percentage                      | Percentage |                |                            |
| <i>Indexes</i>                      |                                 |            |                |                                 |            |                |                            |
| Viral suppression (<1000 copies/mL) | 48%                             | 26%        | 1.9 (1.4, 2.4) | 51%                             | 33%        | 1.5 (1.2, 1.9) | 2.2 (1.6, 2.9)             |

**Supplemental Table 5: Status transitions between 26 and 52 weeks, viral suppression**

|                                             | Viral suppression status at 52 weeks (copies/mL) |             |           |          |
|---------------------------------------------|--------------------------------------------------|-------------|-----------|----------|
|                                             | <40                                              | 40 to <1000 | VL≥1000   | Deceased |
|                                             | n (%)                                            | n (%)       |           |          |
| <i>Viral suppression status at 26 weeks</i> |                                                  |             |           |          |
| <i>Intervention</i>                         |                                                  |             |           |          |
| VL <40 copies/mL                            | 31 (79%)                                         | 5 (13%)     | 3 (8%)    | 0 (0%)   |
| VL 40 to <1000 copies/mL                    | 10 (83%)                                         | 2 (17%)     | 0 (0%)    | 0 (0%)   |
| VL ≥1000 copies/mL                          | 3 (6%)                                           | 4 (8%)      | 41 (85%)  | 0 (0%)   |
| <i>SOC</i>                                  |                                                  |             |           |          |
| VL <40 copies/mL                            | 42 (82%)                                         | 4 (8%)      | 4 (8%)    | 1 (2%)   |
| VL 40 to <1000 copies/mL                    | 13 (46%)                                         | 7 (25%)     | 7 (25%)   | 1 (4%)   |
| VL ≥1000 copies/mL                          | 23 (11%)                                         | 15 (7%)     | 152 (73%) | 18 (9%)  |

Notes: Missing values are excluded. Abbreviations: VL=viral load; SOC=standard of care

**Supplemental Table 6: Mortality data, including causes of death**

|                                       |  |              |
|---------------------------------------|--|--------------|
| <b><i>Index Participants</i></b>      |  | n/N (%)      |
| Total deaths                          |  | 66/502 (13%) |
| Intervention                          |  | 9/126 (7%)   |
| SOC                                   |  | 57/376 (15%) |
| <i>Causes of death</i>                |  | n=66         |
|                                       |  | n (%)        |
| HIV                                   |  | 17 (26%)     |
| Unknown, CD4 cell count <200 cells/μl |  | 16 (24%)     |
| Unknown, CD4 cell count ≥200 cells/μl |  | 12 (18%)     |
| Medical, non-HIV                      |  | 14 (21%)     |
| Trauma                                |  | 3 (5%)       |
| Overdose                              |  | 2 (3%)       |
| Suicide                               |  | 2 (3%)       |
| <b><i>Partners</i></b>                |  | n/N (%)      |
| Total deaths                          |  | 19/806 (2%)  |
| Intervention                          |  | 1/187 (1%)   |
| SOC                                   |  | 18/619 (3%)  |
| <i>Causes of death</i>                |  | n=19         |
|                                       |  | n (%)        |
| Unknown                               |  | 4 (21%)      |
| Medical, non-HIV                      |  | 9 (47%)      |
| Trauma                                |  | 2 (11%)      |
| Overdose                              |  | 3 (16%)      |
| Suicide                               |  | 1 (5%)       |

**Supplemental Table 7: Median viral loads, CD4 counts, and ART duration\* at baseline, by site**

|                              | Ukraine |              | Vietnam |             | Indonesia |            |
|------------------------------|---------|--------------|---------|-------------|-----------|------------|
|                              | Median  | (IQR)        | Median  | (IQR)       | Median    | (IQR)      |
| Viral load (copies/mL)       | 4.5     | (3.8, 5.1)   | 4.6     | (4.1, 5.0)  | 4.5       | (4.2, 4.9) |
| CD4 count (cells/μl)         | 310     | (178, 465)   | 314     | (187, 492)  | 271       | (147, 418) |
| Median ART duration (years)* | 0.05    | (0.01, 0.12) | 0.15    | (0.04, 2.0) | 5.0       | (1.2, 6.9) |

\*Only among those currently on ART (Ukraine, n=3; Vietnam, n=28; Indonesia, n=23)

**Supplemental Table 8: Primary endpoints as listed in the HPTN 074 protocol, results and status**

| <b>Primary Endpoints as listed in the HPTN 074 protocol</b>                                                                                                                                                                                                                                                                                                                                                                                                                                                         | <b>Results, Status, Comments</b>                                                                                                                                                                                                                                                   |
|---------------------------------------------------------------------------------------------------------------------------------------------------------------------------------------------------------------------------------------------------------------------------------------------------------------------------------------------------------------------------------------------------------------------------------------------------------------------------------------------------------------------|------------------------------------------------------------------------------------------------------------------------------------------------------------------------------------------------------------------------------------------------------------------------------------|
| <b>HIV incidence</b> - Overall and by site HIV seroconversion rates of network injection partners in the standard of care arm                                                                                                                                                                                                                                                                                                                                                                                       | Overall incidence in the standard of care arm is presented in the text. Incidence rates were too low to compute meaningful site-specific incidence rates.                                                                                                                          |
| <b>Enrolment and retention</b>                                                                                                                                                                                                                                                                                                                                                                                                                                                                                      | These are operational endpoints intended to inform site-selection and accrual/follow-up timing when planning a larger trial.                                                                                                                                                       |
| 1) Calendar time to enroll and allocate to study arm 500 eligible HIV-infected PWID overall and 167 eligible HIV-infected PWID by study site                                                                                                                                                                                                                                                                                                                                                                        | Presented in text                                                                                                                                                                                                                                                                  |
| 2) Number of eligible HIV-uninfected network injection partners overall and at each site                                                                                                                                                                                                                                                                                                                                                                                                                            | Presented in text                                                                                                                                                                                                                                                                  |
| 3) Proportion of index participants retained at each visit overall and at each site                                                                                                                                                                                                                                                                                                                                                                                                                                 | Retention at 52 weeks presented in text; retention by site available on request<br>Week 4: 451/496 (91%)<br>Week 13: 436/485 (90%)<br>Week 26: 419/473 (89%)<br>Week 39: 401/458 (88%)                                                                                             |
| 4) Proportion of network injection partners, enrolled at index participant's allocation to study arm, retained at each visit overall and at each site                                                                                                                                                                                                                                                                                                                                                               | Retention at 52 weeks presented in text; retention by site available on request<br>Week 4: 714/805 (89%)<br>Week 13: 561/674 (83%)<br>Week 26: 583/704 (83%)<br>Week 39: 586/721 (81%)                                                                                             |
| 5) Mean (SE) person years at risk accumulated per index participant overall and at each site                                                                                                                                                                                                                                                                                                                                                                                                                        | Median (IQR) person-years of follow-up among index participants:<br>Overall: 1.3 (1.0, 1.7)<br>Indonesia-SOC 1.2 (1.0, 1.5); Intervention 1.2 (1.0, 1.5)<br>Ukraine – SOC 1.4 (1.2, 1.7); Intervention 1.4 (1.2, 1.7)<br>Vietnam – SOC 1.4 (1.0, 1.7); Intervention 1.5 (1.2, 1.7) |
| <b>Uptake measures, Intervention component: Systems navigators</b>                                                                                                                                                                                                                                                                                                                                                                                                                                                  | These measures are intended to inform and refine the intervention for future trials and/or in clinical practice; Additional results will be presented in future manuscripts                                                                                                        |
| 1) Overall: Proportion of index participants using systems navigators at least once.                                                                                                                                                                                                                                                                                                                                                                                                                                | Presented in main text                                                                                                                                                                                                                                                             |
| 2) Overall: Mean (standard error) number of contacts (text, email, telephone call, home visit, other) with index participants made with systems navigators (mean contacts per index participant)                                                                                                                                                                                                                                                                                                                    | Indonesia mean: 19; Ukraine mean: 4; Vietnam mean: 17                                                                                                                                                                                                                              |
| 3) Use of navigators for ART: Mean (SE) number of contacts with HIV care sites made by systems navigators per index initiating ART.                                                                                                                                                                                                                                                                                                                                                                                 | Variation (proportion) presented in main text                                                                                                                                                                                                                                      |
| 4) Use of navigators for uptake of substance use treatment: Mean (SE) number of contacts with medication-assisted substance use treatment centers made by systems navigators per index initiating substance use treatment.                                                                                                                                                                                                                                                                                          | Variation (proportion): 124/1605 sessions (8%)                                                                                                                                                                                                                                     |
| <b>Uptake measures, Intervention component: Psychosocial counseling</b>                                                                                                                                                                                                                                                                                                                                                                                                                                             | These measures are intended to inform and refine the intervention for future trials and/or in clinical practice; Additional results will be presented in future manuscripts                                                                                                        |
| 1) Proportion of index participants completing two counseling sessions within four weeks of enrollment                                                                                                                                                                                                                                                                                                                                                                                                              | Presented in main text                                                                                                                                                                                                                                                             |
| <b>Uptake measures, Intervention component: Social network support</b>                                                                                                                                                                                                                                                                                                                                                                                                                                              | These measures are intended to inform and refine the intervention for future trials and/or in clinical practice; Additional results will be presented in future manuscripts                                                                                                        |
| 1) Proportion of index participants with an identified social support person within 13 and 52 weeks of enrollment                                                                                                                                                                                                                                                                                                                                                                                                   | Results to be presented in future manuscript                                                                                                                                                                                                                                       |
| 2) Proportion of index participants completing a joint counseling session with an identified HIV medical care social support person within 13 and 52 weeks of enrollment                                                                                                                                                                                                                                                                                                                                            | Results to be presented in future manuscript                                                                                                                                                                                                                                       |
| <b>Uptake measures, Intervention component: Substance use treatment</b>                                                                                                                                                                                                                                                                                                                                                                                                                                             |                                                                                                                                                                                                                                                                                    |
| 1) Proportion of index participants self-reporting substance use treatment by 4 and 13 weeks                                                                                                                                                                                                                                                                                                                                                                                                                        | These results are presented graphically in the Appendix. Complementary results are presented in the main text.                                                                                                                                                                     |
| 2) Proportion of index participants with detectable methadone or buprenorphine at selected study visits                                                                                                                                                                                                                                                                                                                                                                                                             | Laboratory testing for methadone and buprenorphine are not yet complete. These data will be analyzed and published separately.                                                                                                                                                     |
| <b>Uptake measures, Intervention component: Supported ART</b>                                                                                                                                                                                                                                                                                                                                                                                                                                                       |                                                                                                                                                                                                                                                                                    |
| 1) Proportion of index participants self-reporting initiating ART by 4 and 13 weeks                                                                                                                                                                                                                                                                                                                                                                                                                                 | These results are presented graphically in the Appendix. Complementary results are presented in the main text                                                                                                                                                                      |
| 2) Proportion of index participants on ART with detectable antiretroviral drugs at selected study visits                                                                                                                                                                                                                                                                                                                                                                                                            | Laboratory-based ART assays are ongoing, and will be addressed in a separate manuscript.                                                                                                                                                                                           |
| 3) Proportion of index participants who achieve virologic suppression by 26 and 52 weeks                                                                                                                                                                                                                                                                                                                                                                                                                            | Presented in text                                                                                                                                                                                                                                                                  |
| <b>Feasibility and Barriers</b>                                                                                                                                                                                                                                                                                                                                                                                                                                                                                     |                                                                                                                                                                                                                                                                                    |
| Analyses for feasibility of and barriers to the intervention will be exploratory. Feasibility of the intervention will be assessed through individual semi-structured interviews with the systems navigators, counselors, additional stakeholders, and a subset of index participants randomized to the intervention arm. Barriers will be assessed through the barrier questionnaire with the participants, systems navigators' and counselors' data forms/log books, and interviews with additional stakeholders. | These qualitative results will be presented in a separate manuscript.                                                                                                                                                                                                              |

Supplemental Figure 1

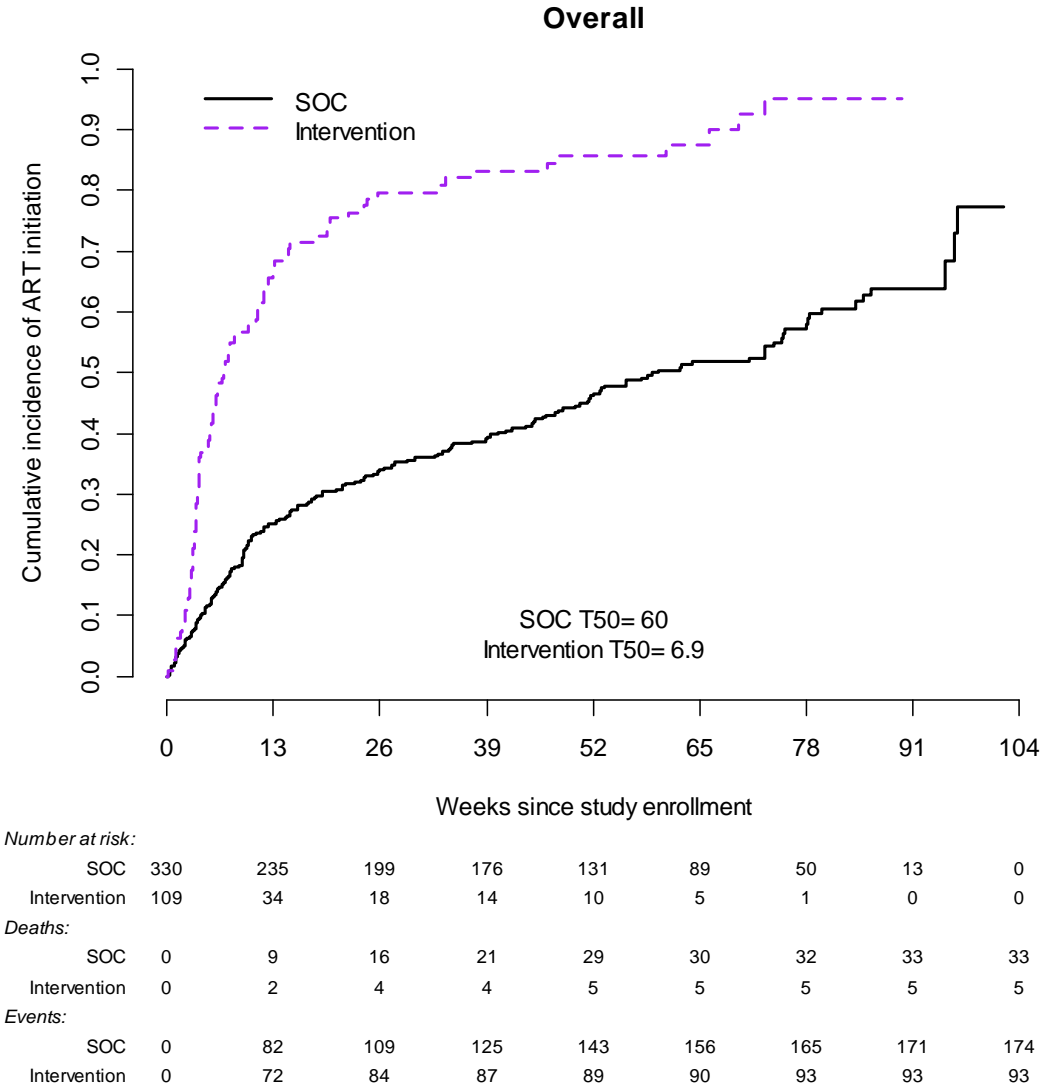

**Supplemental Figure 1:** Cumulative incidence of ART initiation among indexes who reported that they were not on ART at baseline. T50 is the time in weeks when 50% of the participants had initiated ART. At each time point below the x-axis, the number remaining at risk is provided, as well as the number of accumulated deaths that occurred before ART initiation (i.e., death as a competing risk), and the number of accumulated events (people who initiated ART). Purple dashed line: intervention; black solid line: standard of care.

Supplemental Figure 2

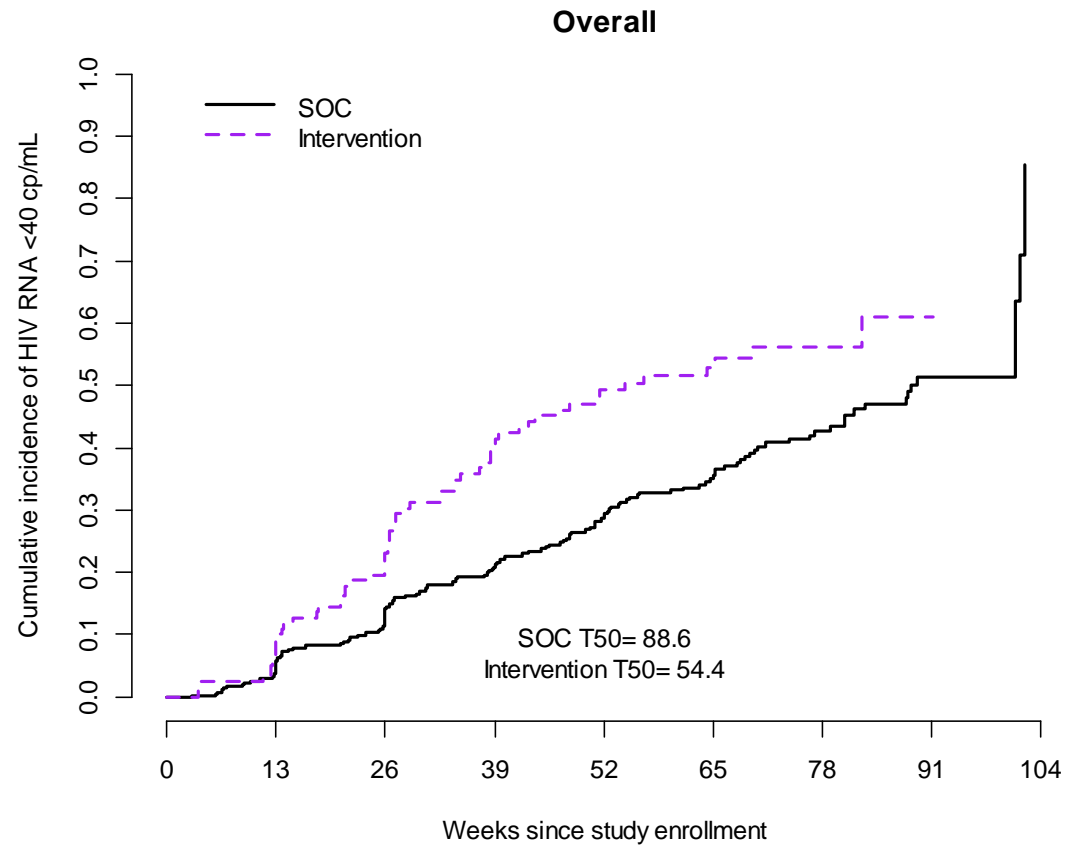

| <i>Number at risk:</i> |     | 0   | 13  | 26  | 39  | 52  | 65  | 78  | 91  | 104 |
|------------------------|-----|-----|-----|-----|-----|-----|-----|-----|-----|-----|
| SOC                    | 365 | 335 | 294 | 251 | 191 | 132 | 78  | 22  | 0   |     |
| Intervention           | 124 | 109 | 90  | 64  | 47  | 31  | 15  | 2   | 0   |     |
| <i>Deaths:</i>         |     | 0   | 13  | 26  | 39  | 52  | 65  | 78  | 91  | 104 |
| SOC                    | 0   | 10  | 19  | 29  | 42  | 44  | 47  | 49  | 51  |     |
| Intervention           | 0   | 3   | 6   | 6   | 7   | 7   | 8   | 9   | 9   |     |
| <i>Events:</i>         |     | 0   | 13  | 26  | 39  | 52  | 65  | 78  | 91  | 104 |
| SOC                    | 0   | 21  | 49  | 72  | 95  | 111 | 124 | 133 | 137 |     |
| Intervention           | 0   | 12  | 27  | 47  | 55  | 58  | 60  | 61  | 61  |     |

**Supplemental Figure 2:** Cumulative incidence of viral suppression (HIV RNA <40 copies/mL) among indexes who were not virally suppressed at baseline. T50 is the time in weeks for 50% of the population to become virally suppressed. At each time point below the x-axis, the number remaining at risk is provided, as well as the number of accumulated deaths that occurred before viral suppression (i.e., death as a competing risk), and the number of accumulated events (people who achieved HIV RNA <40 cp/mL). Purple dashed line: intervention; black solid line: standard of care. cp/ml = copies/mL

Supplemental Figure 3

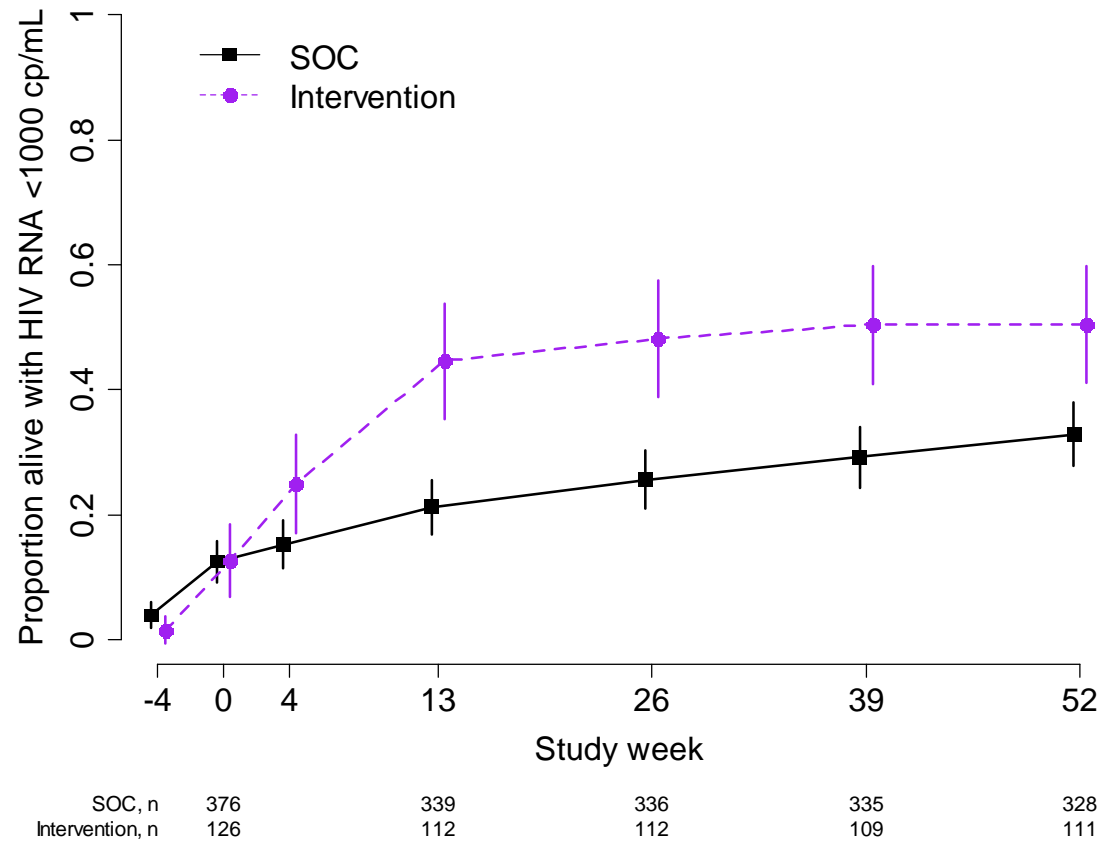

**Supplemental Figure 3** Proportion of indexes alive and virally suppressed with HIV RNA <1000 copies/mL. 95% confidence intervals are calculated with the Wald method. Purple dashed line: intervention; black solid line: standard of care. cp/ml = copies/mL



Supplemental Figure 4

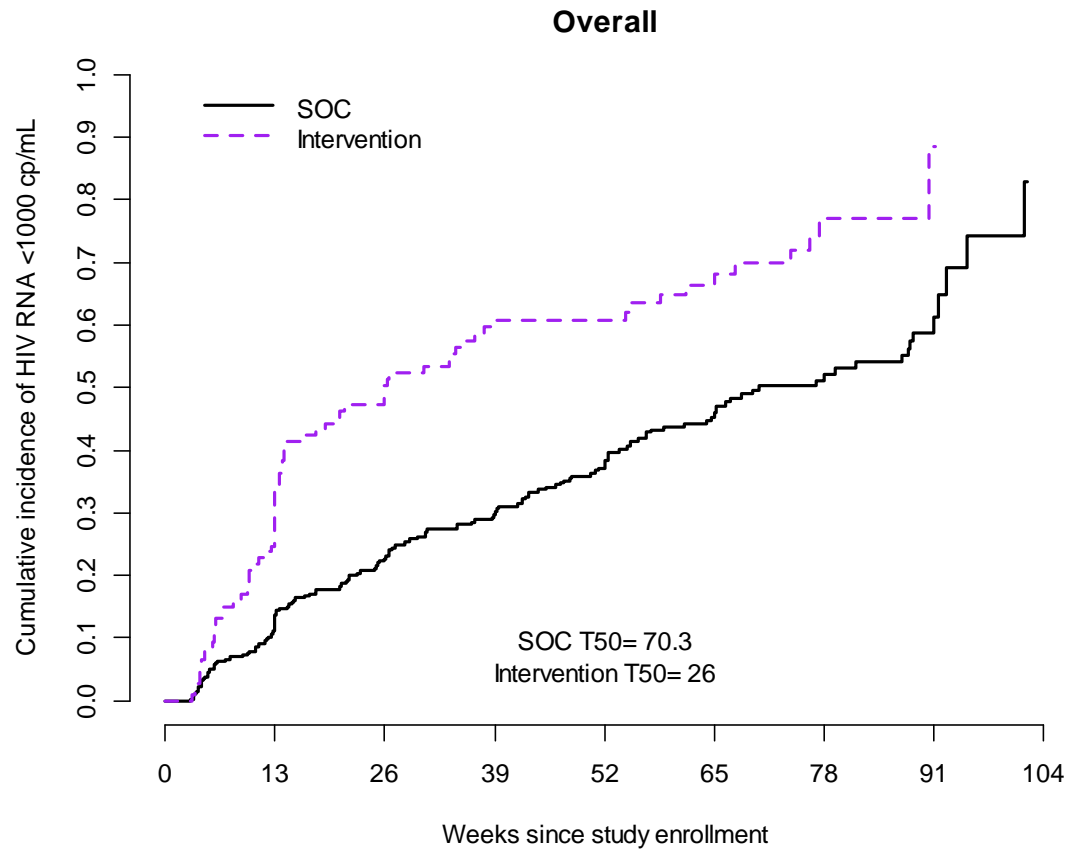

|                        |  | 0   | 13  | 26  | 39  | 52  | 65  | 78  | 91  | 104 |
|------------------------|--|-----|-----|-----|-----|-----|-----|-----|-----|-----|
| <i>Number at risk:</i> |  |     |     |     |     |     |     |     |     |     |
| SOC                    |  | 321 | 273 | 228 | 196 | 148 | 93  | 55  | 17  | 0   |
| Intervention           |  | 108 | 77  | 51  | 37  | 31  | 19  | 6   | 1   | 0   |
| <i>Deaths:</i>         |  |     |     |     |     |     |     |     |     |     |
| SOC                    |  | 0   | 9   | 17  | 25  | 35  | 37  | 40  | 42  | 43  |
| Intervention           |  | 0   | 3   | 5   | 5   | 6   | 6   | 7   | 8   | 8   |
| <i>Events:</i>         |  |     |     |     |     |     |     |     |     |     |
| SOC                    |  | 0   | 43  | 70  | 92  | 110 | 129 | 138 | 145 | 149 |
| Intervention           |  | 0   | 35  | 52  | 62  | 62  | 67  | 71  | 72  | 72  |

**Supplemental Figure 4:** Cumulative incidence of viral suppression (HIV RNA <1,000 copies/mL) among indexes who were not virally suppressed at baseline. T50 is the time in weeks for 50% of the population to become virally suppressed. At each time point below the x-axis, the number remaining at risk is provided, as well as the number of accumulated deaths that occurred before viral suppression (i.e., death as a competing risk), and the number of accumulated events (people who achieved HIV RNA <1,000 cp/mL). Purple dashed line: intervention; black solid line: standard of care. cp/ml = copies/mL

Supplemental Figure 5

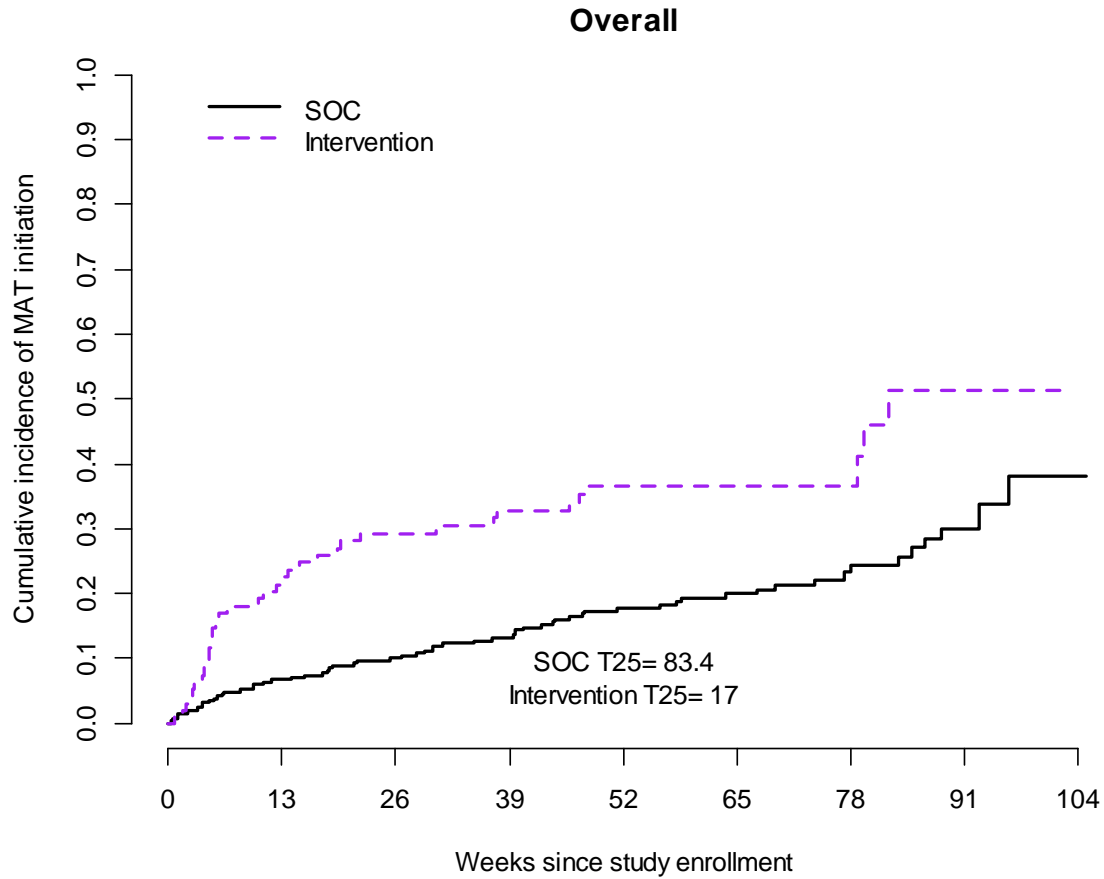

|                        |     | 0   | 13  | 26  | 39  | 52  | 65 | 78 | 91 | 104 |
|------------------------|-----|-----|-----|-----|-----|-----|----|----|----|-----|
| <i>Number at risk:</i> |     |     |     |     |     |     |    |    |    |     |
| SOC                    | 288 | 257 | 236 | 217 | 171 | 121 | 69 | 25 | 2  |     |
| Intervention           | 96  | 70  | 61  | 55  | 46  | 30  | 16 | 6  | 0  |     |
| <i>Deaths:</i>         |     |     |     |     |     |     |    |    |    |     |
| SOC                    | 0   | 8   | 15  | 22  | 32  | 34  | 37 | 38 | 39 |     |
| Intervention           | 0   | 2   | 3   | 3   | 3   | 3   | 3  | 3  | 3  |     |
| <i>Events:</i>         |     |     |     |     |     |     |    |    |    |     |
| SOC                    | 0   | 19  | 28  | 36  | 47  | 51  | 56 | 60 | 62 |     |
| Intervention           | 0   | 20  | 27  | 30  | 33  | 33  | 33 | 36 | 36 |     |

**Supplemental Figure 5:** Cumulative incidence of medication assisted treatment (MAT) initiation among indexes not on MAT at baseline. T25 is the time in weeks for 25% of the population to initiate MAT. At each time point below the x-axis, the number remaining at risk is provided, as well as the number of accumulated deaths that occurred before MAT initiation (i.e., death as a competing risk), and the number of accumulated events (people who initiated MAT). Purple dashed line: intervention; black solid line: standard of care.

Supplemental Figure 6

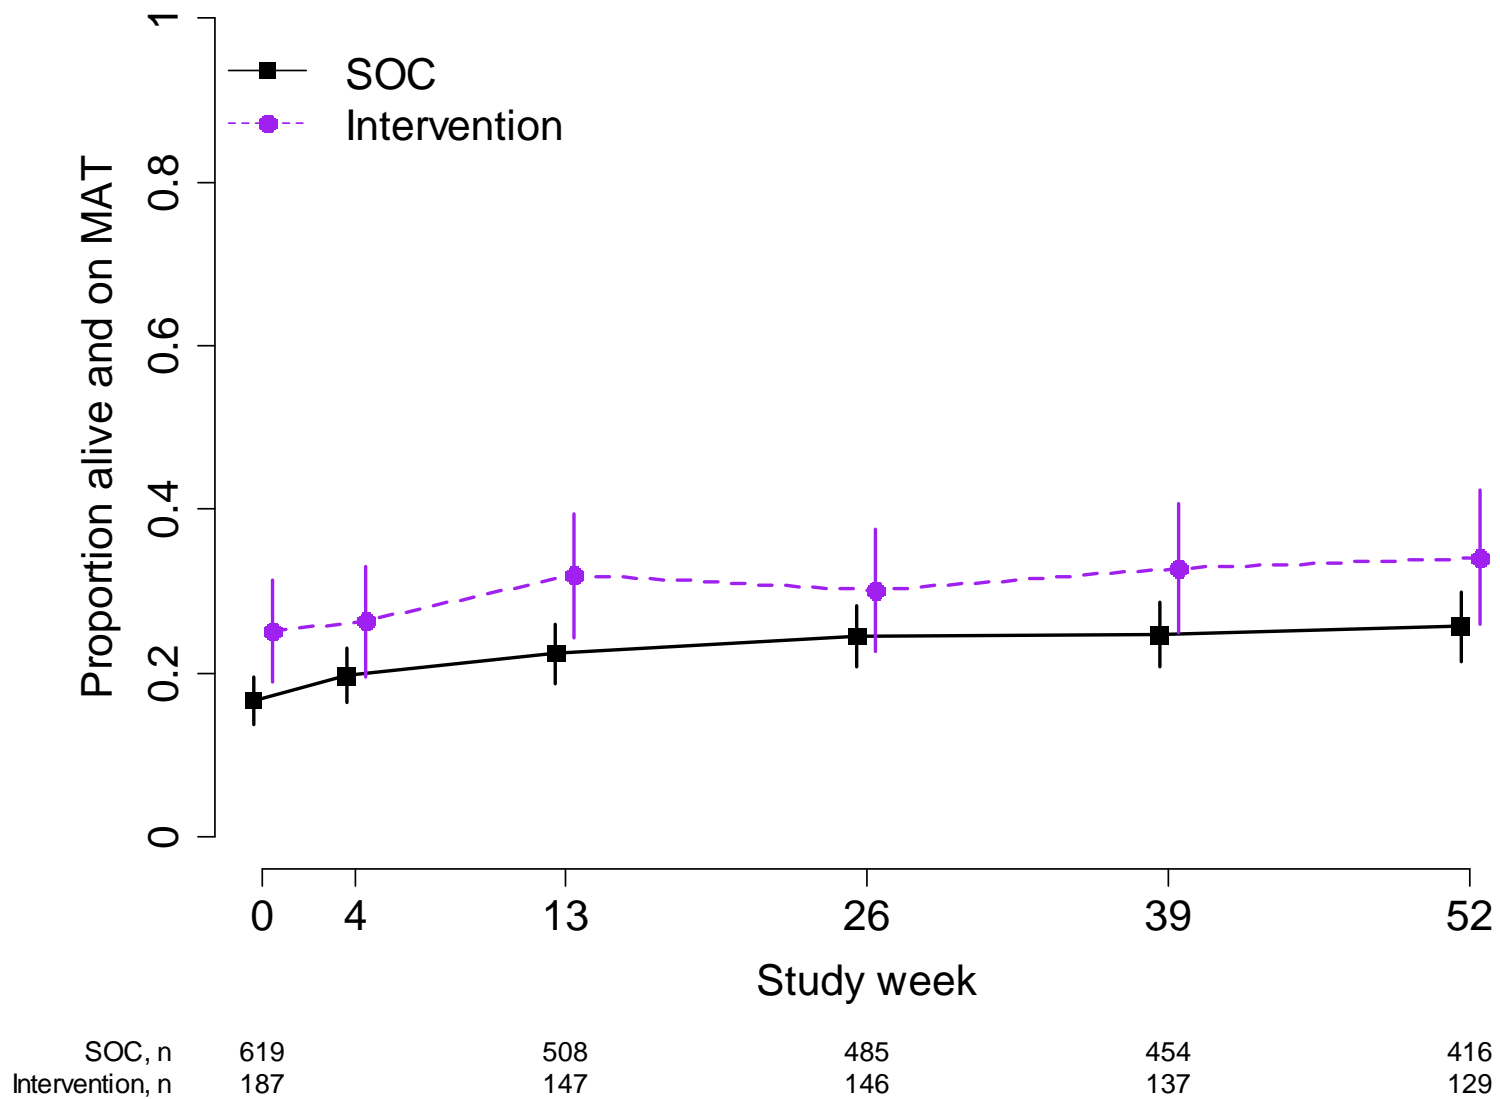

Supplemental Figure 6: Proportion of partners alive and on medication assisted treatment (MAT) at specific time points. Purple dashed line: intervention; black solid line: standard of care.

Supplemental Figure 7

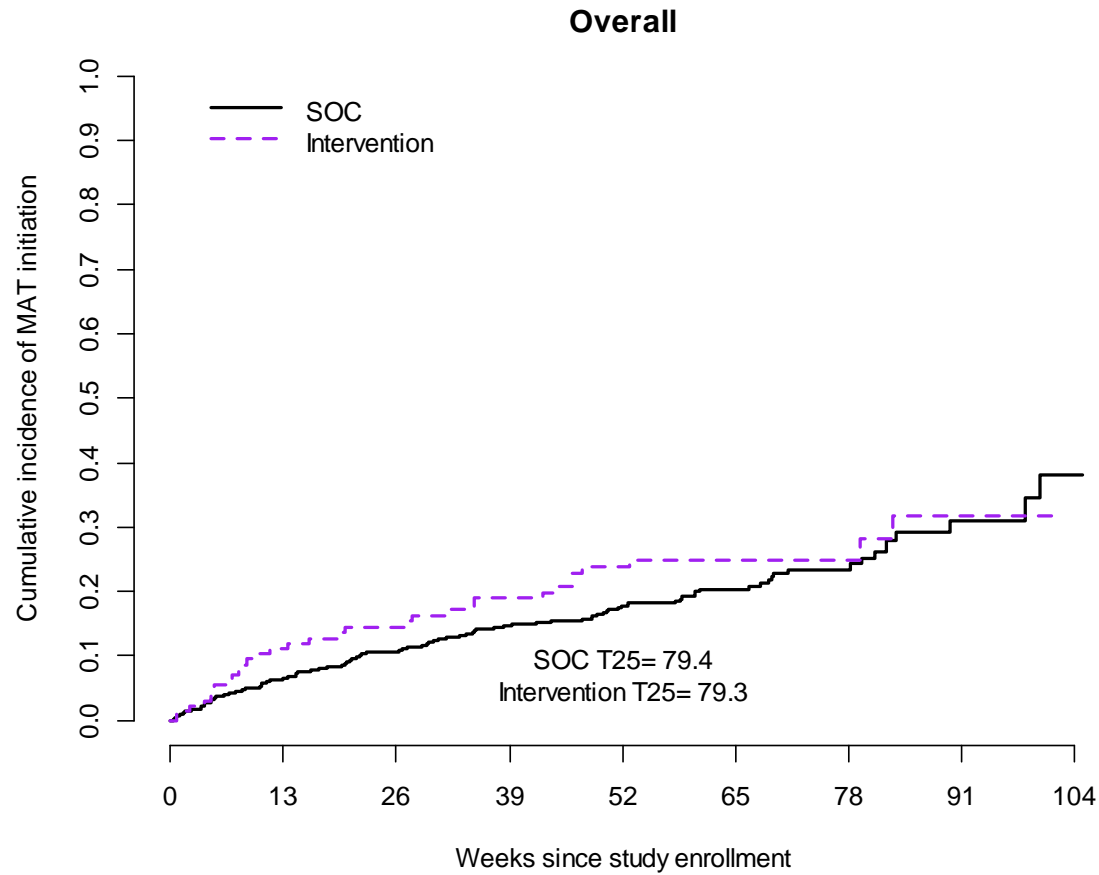

|                        | 0   | 13  | 26  | 39  | 52  | 65  | 78 | 91 | 104 |
|------------------------|-----|-----|-----|-----|-----|-----|----|----|-----|
| <i>Number at risk:</i> |     |     |     |     |     |     |    |    |     |
| SOC                    | 497 | 436 | 386 | 331 | 266 | 169 | 89 | 28 | 1   |
| Intervention           | 130 | 109 | 98  | 87  | 70  | 51  | 25 | 7  | 0   |
| <i>Deaths:</i>         |     |     |     |     |     |     |    |    |     |
| SOC                    | 0   | 1   | 7   | 9   | 12  | 15  | 15 | 15 | 15  |
| Intervention           | 0   | 0   | 0   | 0   | 0   | 1   | 1  | 1  | 1   |
| <i>Events:</i>         |     |     |     |     |     |     |    |    |     |
| SOC                    | 0   | 32  | 50  | 67  | 78  | 85  | 91 | 98 | 100 |
| Intervention           | 0   | 14  | 18  | 23  | 28  | 29  | 29 | 31 | 31  |

**Supplemental Figure 7:** Cumulative incidence of medication assisted treatment (MAT) initiation among partners not on MAT at baseline. T25 is the time in weeks for 25% of the population to initiate MAT. At each time point below the x-axis, the number remaining at risk is provided, as well as the number of accumulated deaths that occurred before MAT initiation (i.e., death as a competing risk), and the number of accumulated events (people who initiated MAT). Purple dashed line: intervention; black solid line: standard of care.

**Supplemental Figure 8**

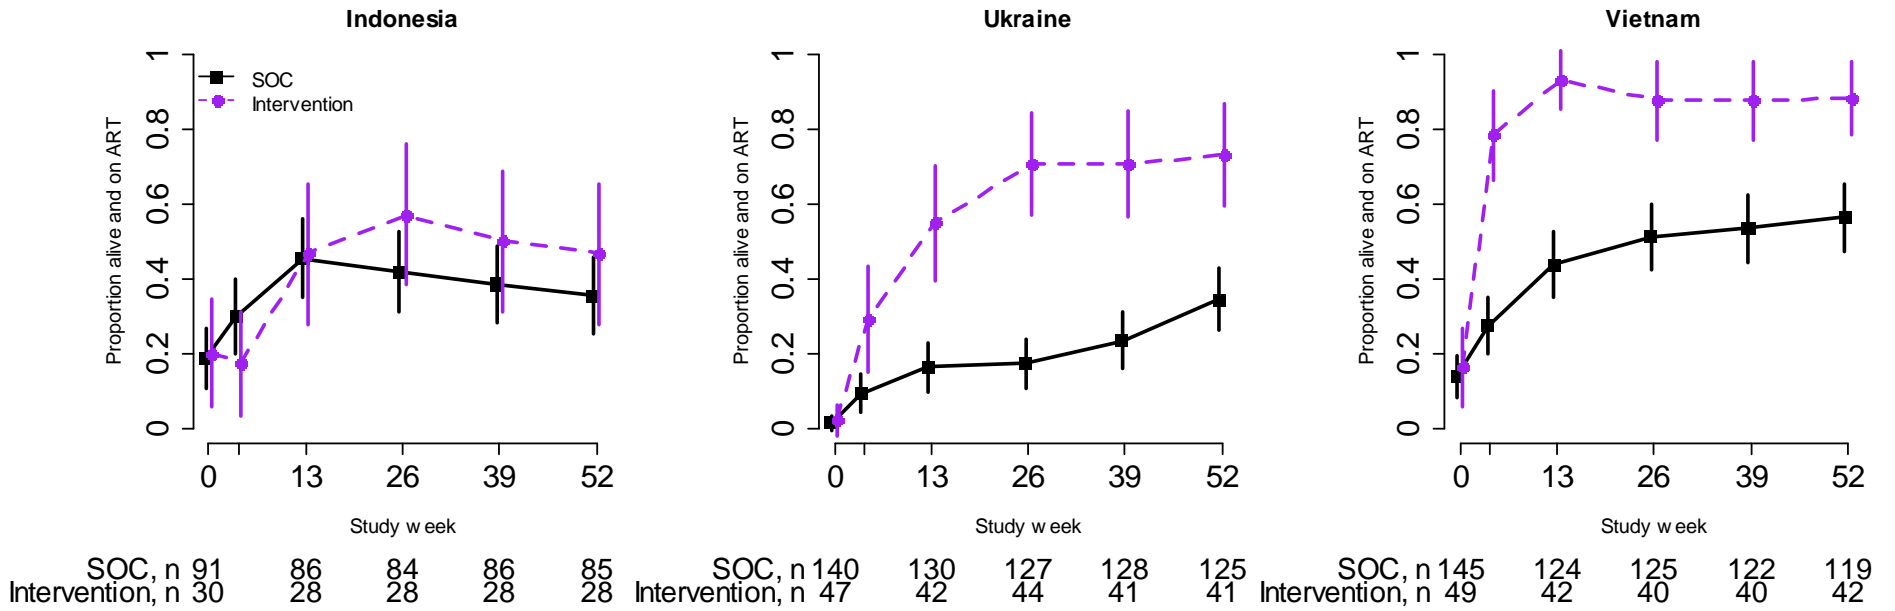

**Supplemental Figure 8:** Proportion of index participants alive and reporting that they are on ART by site. Purple dashed line: intervention; black solid line: standard of care.

**Supplemental Figure 9**

**A. HIV RNA <40 copies/mL**

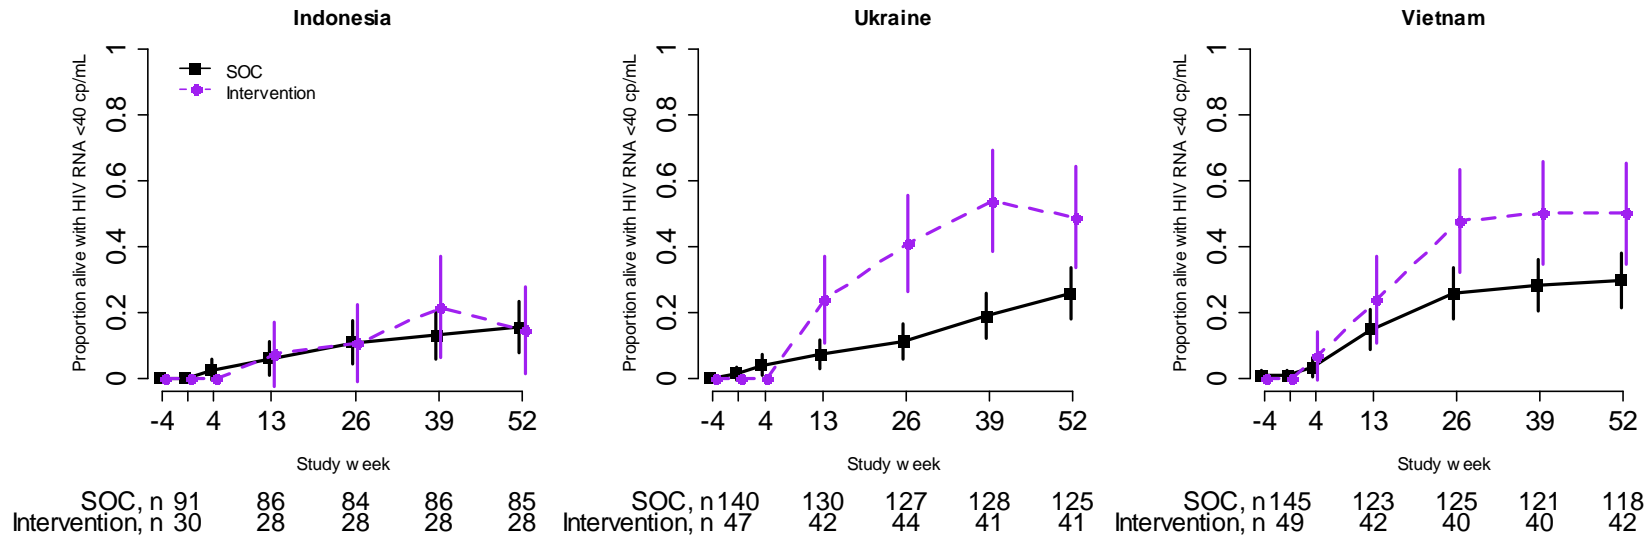

**B. HIV RNA <1000 copies/mL**

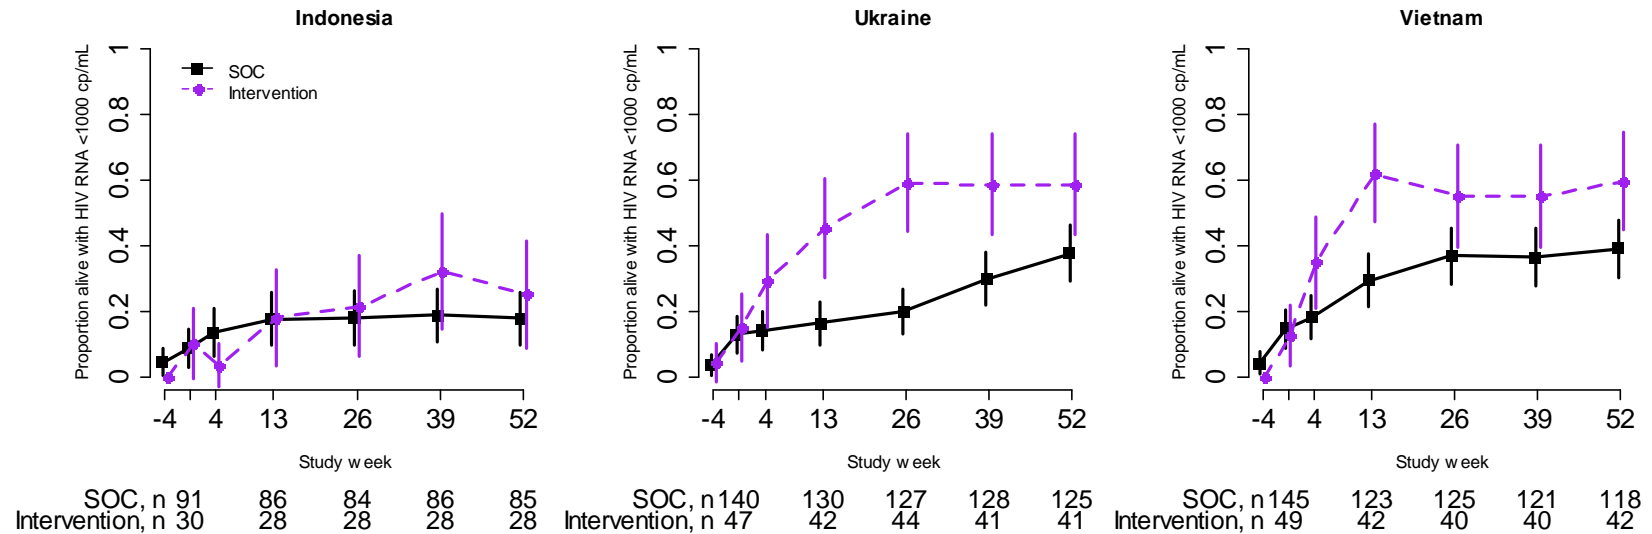

**Supplemental Figure 9:** Proportion of index participants alive and virally suppressed by site. **A.** Viral suppression < 40 copies/mL; **B.** Viral suppression < 1000 copies/mL. Purple dashed line: intervention; black solid line: standard of care. cp/ml = copies/mL

**Supplemental Figure 10**

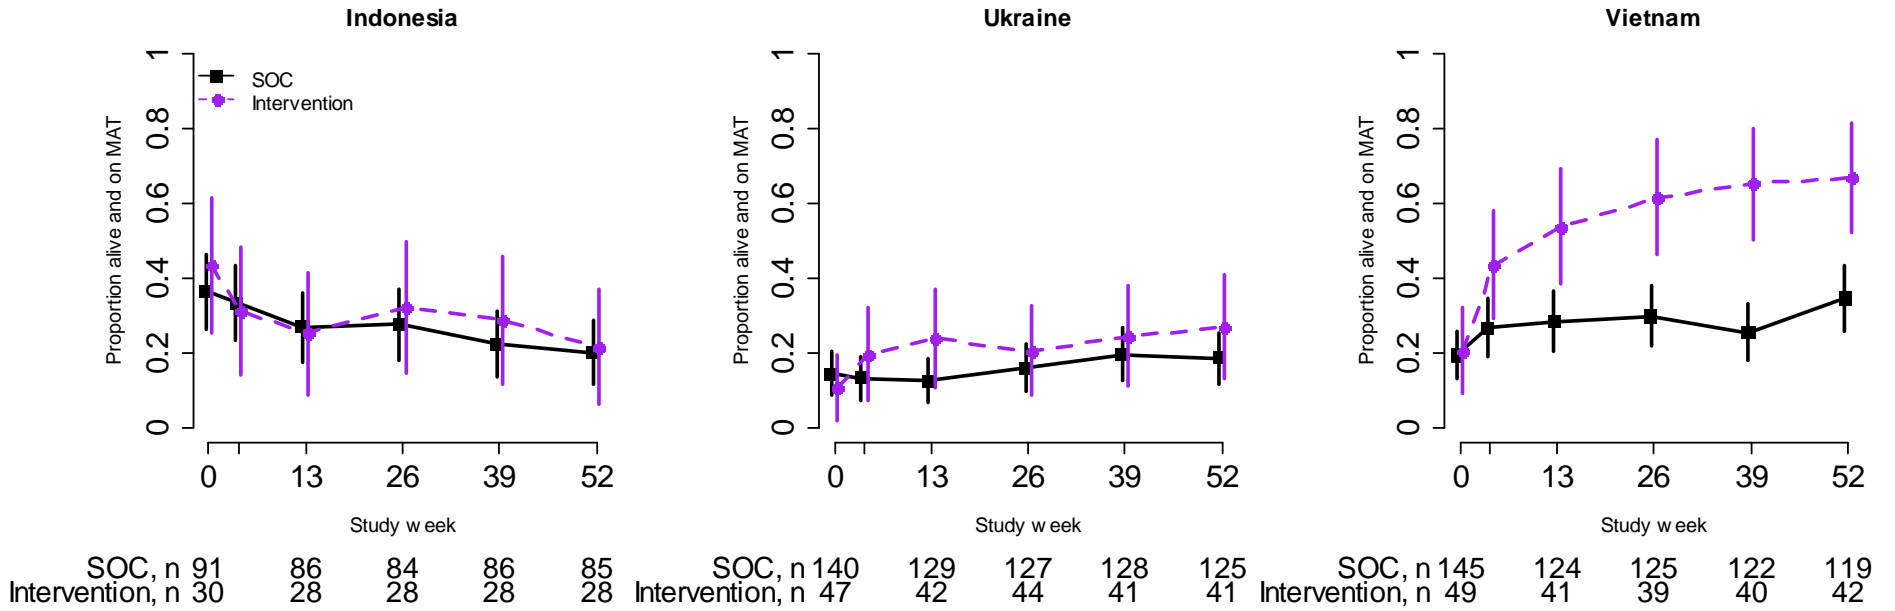

**Supplemental Figure 10:** Proportion of index participants alive and on MAT by site. Purple dashed line: intervention; black solid line: standard of care.

**Supplemental Figure 11**

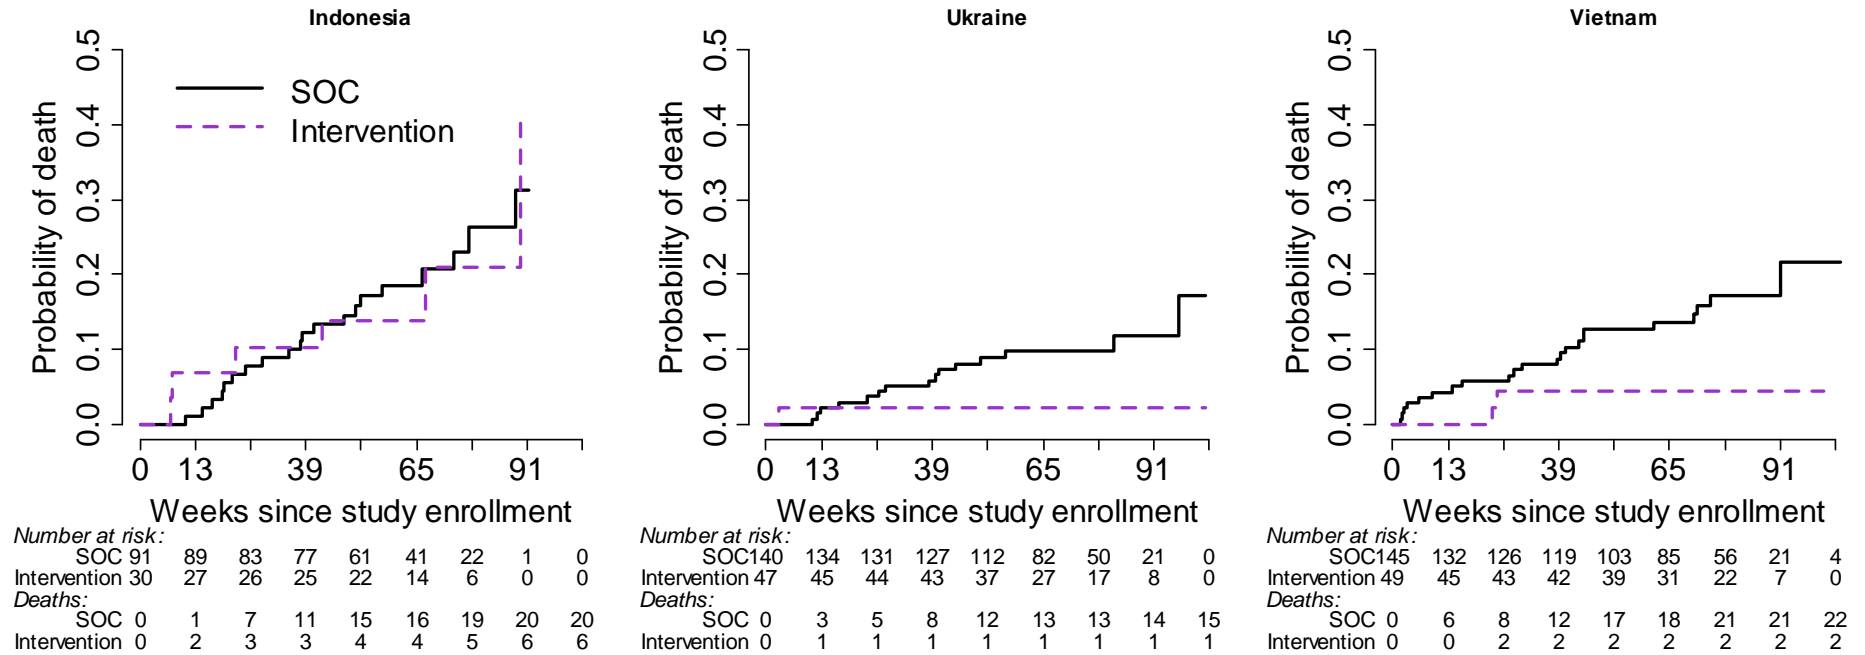

**Supplemental Figure 11:** Cumulative probability of death for index participants by site. At each time point below the x-axis, the number remaining at risk is provided, as well as the number of accumulated deaths. Note that the number of participants with follow-up beyond 91 weeks is limited. Purple dashed line: intervention; black solid line: standard of care.
